# Supplementary material
Source: PubMed Central journal article supplement (PMC7901383)
Supplement: mmc1.pdf [file mmc1.pdf]

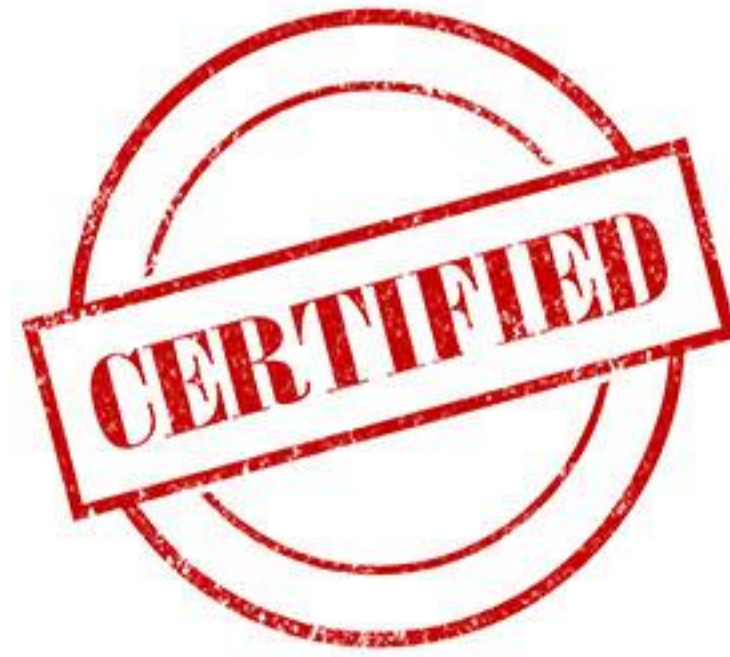

**CERTIFICATE**  
*Of English Editing*

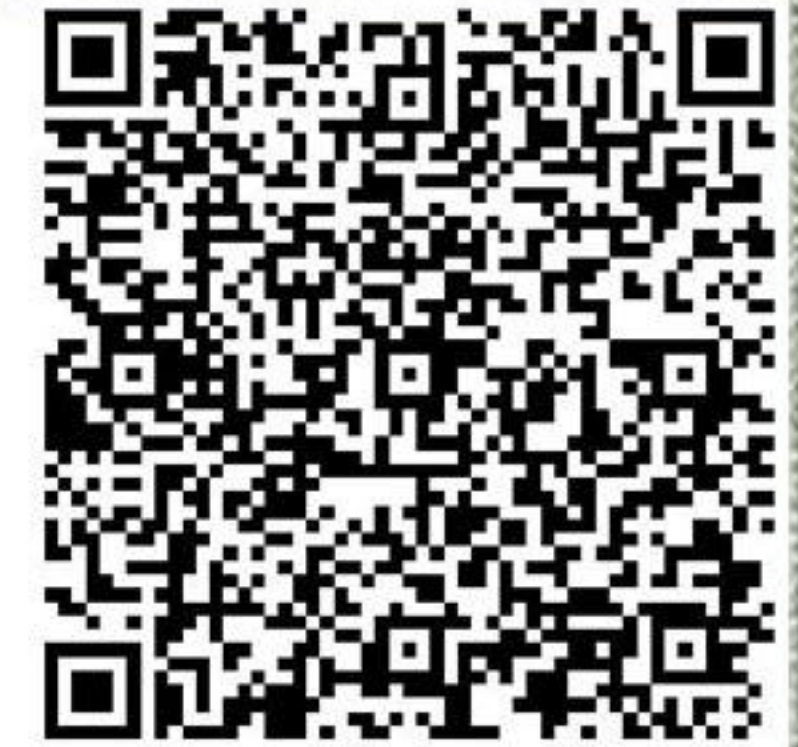

This is to certify that the article titled  
*Fatal disseminated aspergillosis in an immunocompetent patient with COVID-19 due to  
Aspergillus ochraceus*

has been edited for language by the  
native English editorial board of Research Editor

No 701 ,Silver Apt ,Satarkhan St ,Shiraz Iran  
Po. Box: 7184737747  
Tel: +987136286120  
<https://www.researcheditor.ir/>

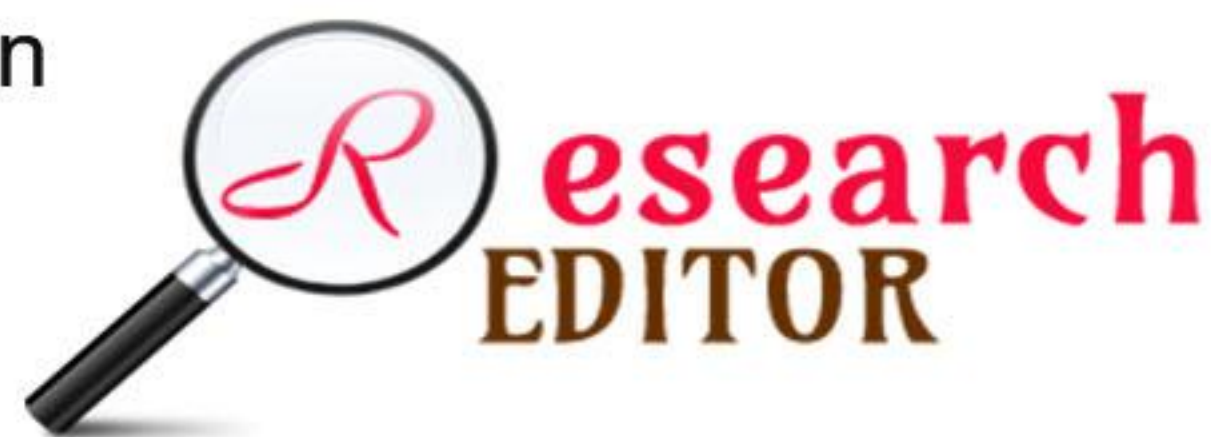

Research Editor  
02/06/2021
